# Supplementary material for: Effectiveness Associated With BNT162b2 Vaccine Against Emergency Department and Urgent Care Encounters for Delta and Omicron SARS-CoV-2 Infection Among Adolescents Aged 12 to 17 Years
Source: PubMed Central journal article supplement — JAMA Netw Open. 2022 Aug 3;5(8):e2225162. doi: 10.1001/jamanetworkopen.2022.25162 (PMC9350713; doi:10.1001/jamanetworkopen.2022.25162), 2022-08-03
Supplement: jamanetwopen-e2225162-s001.pdf [file jamanetwopen-e2225162-s001.pdf]

## Supplemental Online Content

Tartof SY, Frankland TB, Slezak JM, et al. Effectiveness associated with BNT162b2 vaccine against emergency department and urgent care encounters for Delta and Omicron SARS-CoV-2 infection among adolescents aged 12 to 17 years. *JAMA Netw Open*. 2022;5(8):e2225162. doi:10.1001/jamanetworkopen.2022.25162

**eTable 1.** Acute Respiratory Infection Codes, November 1, 2021, to March 18, 2022

**eTable 2.** Adjusted Effectiveness Associated With BNT162b2 Against Emergency Department or Urgent Care Encounters (Without Subsequent Hospitalization) for Delta- or Omicron-Related Acute Respiratory Illness

**eTable 3.** Unadjusted and Adjusted Effectiveness Associated With BNT162b2 Against Emergency Department or Urgent Care Encounters (Without Subsequent Hospitalization) for Delta- or Omicron-Related Acute Respiratory Illness Among Patients Without Prior Documented SARS-CoV-2 Infection

This supplemental material has been provided by the authors to give readers additional information about their work.

**eTable 1.** Acute Respiratory Infection Codes, November 1, 2021, to March 18, 2022

|        |                                                              |
|--------|--------------------------------------------------------------|
| A48.1  | LEGIONNAIRES' DISEASE                                        |
| B34.2  | CORONAVIRUS INFECTION, UNSPECIFIED                           |
| B44.0  | INVASIVE PULMONARY ASPERGILLOSIS                             |
| B97.29 | OTH CORONAVIRUS AS THE CAUSE OF DISEASES CLASSD ELSWHR       |
| J00    | ACUTE NASOPHARYNGITIS (COMMON COLD)                          |
| J01.00 | ACUTE MAXILLARY SINUSITIS, UNSPECIFIED                       |
| J01.10 | ACUTE FRONTAL SINUSITIS, UNSPECIFIED                         |
| J01.20 | ACUTE ETHMOIDAL SINUSITIS, UNSPECIFIED                       |
| J01.30 | ACUTE SPHENOIDAL SINUSITIS, UNSPECIFIED                      |
| J01.40 | ACUTE PANSINUSITIS, UNSPECIFIED                              |
| J01.80 | OTHER ACUTE SINUSITIS                                        |
| J01.90 | ACUTE SINUSITIS, UNSPECIFIED                                 |
| J02.0  | STREPTOCOCCAL PHARYNGITIS                                    |
| J02.8  | ACUTE PHARYNGITIS DUE TO OTHER SPECIFIED ORGANISMS           |
| J02.9  | ACUTE PHARYNGITIS, UNSPECIFIED                               |
| J03.00 | ACUTE STREPTOCOCCAL TONSILLITIS, UNSPECIFIED                 |
| J03.90 | ACUTE TONSILLITIS, UNSPECIFIED                               |
| J04.0  | ACUTE LARYNGITIS                                             |
| J04.10 | ACUTE TRACHEITIS WITHOUT OBSTRUCTION                         |
| J05.0  | ACUTE OBSTRUCTIVE LARYNGITIS (CROUP)                         |
| J05.10 | ACUTE EPIGLOTTITIS WITHOUT OBSTRUCTION                       |
| J06.0  | ACUTE LARYNGOPHARYNGITIS                                     |
| J06.9  | ACUTE UPPER RESPIRATORY INFECTION, UNSPECIFIED               |
| J09.X1 | INFLUENZA DUE TO IDENT NOVEL INFLUENZA A VIRUS W PNEUMONIA   |
| J09.X2 | FLU DUE TO IDENT NOVEL INFLUENZA A VIRUS W OTH RESP MANIFEST |
| J10.00 | FLU DUE TO OTH IDENT FLU VIRUS W UNSP TYPE OF PNEUMONIA      |
| J10.01 | FLU DUE TO OTH IDENT FLU VIRUS W SAME OTH IDENT FLU VIRUS PN |
| J10.08 | INFLUENZA DUE TO OTH IDENT INFLUENZA VIRUS W OTH PNEUMONIA   |
| J10.1  | FLU DUE TO OTH IDENT INFLUENZA VIRUS W OTH RESP MANIFEST     |
| J10.2  | INFLUENZA DUE TO OTH IDENT INFLUENZA VIRUS W GI MANIFEST     |
| J11.00 | FLU DUE TO UNIDENTIFIED FLU VIRUS W UNSP TYPE OF PNEUMONIA   |
| J11.08 | FLU DUE TO UNIDENTIFIED FLU VIRUS W SPECIFIED PNEUMONIA      |
| J11.1  | FLU DUE TO UNIDENTIFIED INFLUENZA VIRUS W OTH RESP MANIFEST  |
| J12.1  | RESPIRATORY SYNCYTIAL VIRUS PNEUMONIA                        |
| J12.2  | PARAINFLUENZA VIRUS PNEUMONIA                                |
| J12.3  | HUMAN METAPNEUMOVIRUS PNEUMONIA                              |
| J12.81 | PNEUMONIA DUE TO SARS-ASSOCIATED CORONAVIRUS                 |
| J12.82 | PNEUMONIA DUE TO CORONAVIRUS DISEASE 2019                    |
| J12.89 | OTHER VIRAL PNEUMONIA                                        |
| J12.9  | VIRAL PNEUMONIA, UNSPECIFIED                                 |

|         |                                                              |
|---------|--------------------------------------------------------------|
| J13     | PNEUMONIA DUE TO STREPTOCOCCUS PNEUMONIAE                    |
| J14     | PNEUMONIA DUE TO HEMOPHILUS INFLUENZAE                       |
| J15.0   | PNEUMONIA DUE TO KLEBSIELLA PNEUMONIAE                       |
| J15.1   | PNEUMONIA DUE TO PSEUDOMONAS                                 |
| J15.20  | PNEUMONIA DUE TO STAPHYLOCOCCUS, UNSPECIFIED                 |
| J15.211 | PNEUMONIA DUE TO METHICILLIN SUSCEP STAPH                    |
| J15.212 | PNEUMONIA DUE TO METHICILLIN RESISTANT STAPHYLOCOCCUS AUREUS |
| J15.4   | PNEUMONIA DUE TO OTHER STREPTOCOCCI                          |
| J15.5   | PNEUMONIA DUE TO ESCHERICHIA COLI                            |
| J15.6   | PNEUMONIA DUE TO OTHER AEROBIC GRAM-NEGATIVE BACTERIA        |
| J15.7   | PNEUMONIA DUE TO MYCOPLASMA PNEUMONIAE                       |
| J15.8   | PNEUMONIA DUE TO OTHER SPECIFIED BACTERIA                    |
| J15.9   | UNSPECIFIED BACTERIAL PNEUMONIA                              |
| J16.8   | PNEUMONIA DUE TO OTHER SPECIFIED INFECTIOUS ORGANISMS        |
| J18.0   | BRONCHOPNEUMONIA, UNSPECIFIED ORGANISM                       |
| J18.1   | LOBAR PNEUMONIA, UNSPECIFIED ORGANISM                        |
| J18.8   | OTHER PNEUMONIA, UNSPECIFIED ORGANISM                        |
| J18.9   | PNEUMONIA, UNSPECIFIED ORGANISM                              |
| J20.2   | ACUTE BRONCHITIS DUE TO STREPTOCOCCUS                        |
| J20.5   | ACUTE BRONCHITIS DUE TO RESPIRATORY SYNCYTIAL VIRUS          |
| J20.6   | ACUTE BRONCHITIS DUE TO RHINOVIRUS                           |
| J20.8   | ACUTE BRONCHITIS DUE TO OTHER SPECIFIED ORGANISMS            |
| J20.9   | ACUTE BRONCHITIS, UNSPECIFIED                                |
| J22     | UNSPECIFIED ACUTE LOWER RESPIRATORY INFECTION                |
| J39.0   | RETROPHARYNGEAL AND PARAPHARYNGEAL ABSCESS                   |
| J39.1   | OTHER ABSCESS OF PHARYNX                                     |
| J39.2   | OTHER DISEASES OF PHARYNX                                    |
| J39.8   | OTHER SPECIFIED DISEASES OF UPPER RESPIRATORY TRACT          |
| J80     | ACUTE RESPIRATORY DISTRESS SYNDROME                          |
| J96.00  | ACUTE RESPIRATORY FAILURE, UNSP W HYPOXIA OR HYPERCAPNIA     |
| J96.01  | ACUTE RESPIRATORY FAILURE WITH HYPOXIA                       |
| J96.02  | ACUTE RESPIRATORY FAILURE WITH HYPERCAPNIA                   |
| J96.10  | CHRONIC RESPIRATORY FAILURE, UNSP W HYPOXIA OR HYPERCAPNIA   |
| J96.11  | CHRONIC RESPIRATORY FAILURE WITH HYPOXIA                     |
| J96.12  | CHRONIC RESPIRATORY FAILURE WITH HYPERCAPNIA                 |
| J96.20  | ACUTE AND CHR RESP FAILURE, UNSP W HYPOXIA OR HYPERCAPNIA    |
| J96.21  | ACUTE AND CHRONIC RESPIRATORY FAILURE WITH HYPOXIA           |
| J96.22  | ACUTE AND CHRONIC RESPIRATORY FAILURE WITH HYPERCAPNIA       |
| J96.90  | RESPIRATORY FAILURE, UNSP, UNSP W HYPOXIA OR HYPERCAPNIA     |
| J96.91  | RESPIRATORY FAILURE, UNSPECIFIED WITH HYPOXIA                |
| J96.92  | RESPIRATORY FAILURE, UNSPECIFIED WITH HYPERCAPNIA            |

|        |                                                          |
|--------|----------------------------------------------------------|
| M35.81 | MULTISYSTEM INFLAMATORY SYNDROME                         |
| M35.89 | OTHER SPECIFIED SYSTEMIC INVOLVMENT OF CONNECTIVE TISSUE |
| R05.1  | ACUTE COUGH                                              |
| R05.3  | CHRONIC COUGH                                            |
| R05.4  | COUGH SYNCOPE                                            |
| R05.8  | OTHER SPECIFIED COUGH                                    |
| R05.9  | COUGH, UNSPECIFIED                                       |
| R09.2  | RESPIRATORY ARREST                                       |
| R50.9  | FEVER, UNSPECIFIED                                       |
| U07.1  | COVID-19                                                 |

**eTable 2.** Adjusted Effectiveness Associated With BNT162b2 Against Emergency Department or Urgent Care Encounters (Without Subsequent Hospitalization) for Delta- or Omicron-Related Acute Respiratory Illness

Vaccine effectiveness and 95% confidence intervals based on results from multivariable logistic regression analysis comparing adolescents 12–17 years of age who received the two-dose primary or a third (booster) dose of BNT162b2 compared to the unvaccinated adjusted for age, sex, race/ethnicity, BMI, prior positive PCR test, pediatric comorbidity index, and admission date. Sample size was insufficient to determine effectiveness of three doses of BNT162b2 against delta.

|                                                  | Time since completion of two-dose primary series |             |             |             |             |             |             |               | Time since completion of three-doses (booster) |
|--------------------------------------------------|--------------------------------------------------|-------------|-------------|-------------|-------------|-------------|-------------|---------------|------------------------------------------------|
|                                                  | <2 months                                        |             | 2-4 months  |             | 4-6 months  |             | ≥6 months   |               | Median 19 days                                 |
|                                                  | Delta                                            | Omicron     | Delta       | Omicron     | Delta       | Omicron     | Delta       | Omicron       | Omicron                                        |
| <b>Unadjusted Vaccine Effectiveness (95% CI)</b> | 87 (66- 95)                                      | 72 (54- 83) | 65 (42- 79) | 47 (27- 61) | 67 (52- 78) | 50 (36- 61) | 28 (1- 48)  | -31 (-62- -6) | 91 (82 – 95)                                   |
| <b>Adjusted Vaccine Effectiveness (95% CI)</b>   | 89 (69- 96)                                      | 73 (54- 84) | 68 (46- 81) | 38 (14- 56) | 71 (57- 81) | 45 (28- 57) | 49 (27- 65) | 16 (-7- 34)   | 87 (72-94)                                     |
| <b>Test-Negative Case-Control Status</b>         |                                                  |             |             |             |             |             |             |               |                                                |
| <b>Vaccinated Cases</b>                          | 22                                               |             | 78          |             | 149         |             | 280         |               | 10                                             |
| <b>Unvaccinated Cases</b>                        | 439                                              |             | 439         |             | 439         |             | 439         |               | 439                                            |
| <b>Vaccinated Controls</b>                       | 158                                              |             | 268         |             | 544         |             | 408         |               | 99                                             |
| <b>Unvaccinated Controls</b>                     | 713                                              |             | 713         |             | 713         |             | 713         |               | 713                                            |

**eTable 3.** Unadjusted and Adjusted Effectiveness Associated With BNT162b2 Against Emergency Department or Urgent Care Encounters (Without Subsequent Hospitalization) for Delta- or Omicron-Related Acute Respiratory Illness Among Patients Without Prior Documented SARS-CoV-2 Infection  
Vaccine effectiveness and 95% confidence intervals based on results from multivariable logistic regression analysis comparing adolescents 12–17 years of age who received the two-dose primary or a third (booster) dose of BNT162b2 compared to the unvaccinated adjusted for age, sex, race/ethnicity, BMI, prior positive PCR test, pediatric comorbidity index, and admission date. Sample size was insufficient to determine effectiveness of two or three doses among those with documented prior SARS-CoV-2 infection and among those with three doses of BNT162b2 against delta.

|                                                  | Overall two-dose primary series |                | Time since completion of two-dose primary series |                |                |                |                |                |                |                 | Time since completion of three-doses (booster) |
|--------------------------------------------------|---------------------------------|----------------|--------------------------------------------------|----------------|----------------|----------------|----------------|----------------|----------------|-----------------|------------------------------------------------|
|                                                  |                                 |                | <2 months                                        |                | 2-4 months     |                | 4-6 months     |                | ≥6 months      |                 | Median 19 days                                 |
|                                                  | Delta                           | Omicron        | Delta                                            | Omicron        | Delta          | Omicron        | Delta          | Omicron        | Delta          | Omicron         | Omicron                                        |
| <b>Unadjusted Vaccine Effectiveness (95% CI)</b> | 59<br>(47- 69)                  | 32<br>(19- 44) | 88<br>(67- 96)                                   | 73<br>(54- 84) | 65<br>(42- 79) | 47<br>(27- 62) | 69<br>(54- 79) | 54<br>(41- 65) | 32<br>(5- 51)  | -22<br>(-52- 2) | 91<br>(83- 96)                                 |
| <b>Adjusted Vaccine Effectiveness (95% CI)</b>   | 64<br>(53- 73)                  | 37<br>(23- 49) | 88<br>(68- 96)                                   | 72<br>(52- 84) | 66<br>(44- 80) | 35<br>(9- 54)  | 70<br>(56- 80) | 46<br>(29- 59) | 47<br>(23- 63) | 18<br>(-6- 36)  | 87<br>(71 - 95)                                |
